# Supplementary material for: A highly stretchable, adhesive and absorbent hybrid hydrogel dressing for photothermal/chemodynamic antibacterial therapy
Source: Royal Society of Chemistry journal article supplement (doi:10.1039/d2nj06100g), 2023-01-01
Supplement: d2nj06100g1.pdf [file d2nj06100g1.pdf]

## Supporting Information

### **A highly stretchable, adhesive and absorbent hybrid hydrogel dressing for photothermal/chemodynamic antibacterial therapy**

Wenhua Yi,<sup>†,a</sup> Luo Hai,<sup>†,b</sup> Yuze Luo,<sup>a</sup> Junqin Li,<sup>a</sup> Ke Yang,<sup>a</sup> Lidan He,<sup>a</sup> Shidong Yang,<sup>a</sup> Le Deng,<sup>a</sup> and Dinggeng He<sup>\*,a</sup>

<sup>a</sup>*College of Life Science, State Key Laboratory of Developmental Biology of Freshwater Fish, Hunan Normal University, Changsha 410081, P. R. China*

<sup>b</sup>*Central Laboratory, National Cancer Center/National Clinical Research Center for Cancer/Cancer Hospital & Shenzhen Hospital, Chinese Academic of Medical Sciences & Peking Union Medical College, Shenzhen 518116, P. R. China*

<sup>†</sup>W.Y. and L.H. contributed equally to this work.

E-mail: [hedinggeng@hnu.edu.cn](mailto:hedinggeng@hnu.edu.cn) (D. He)

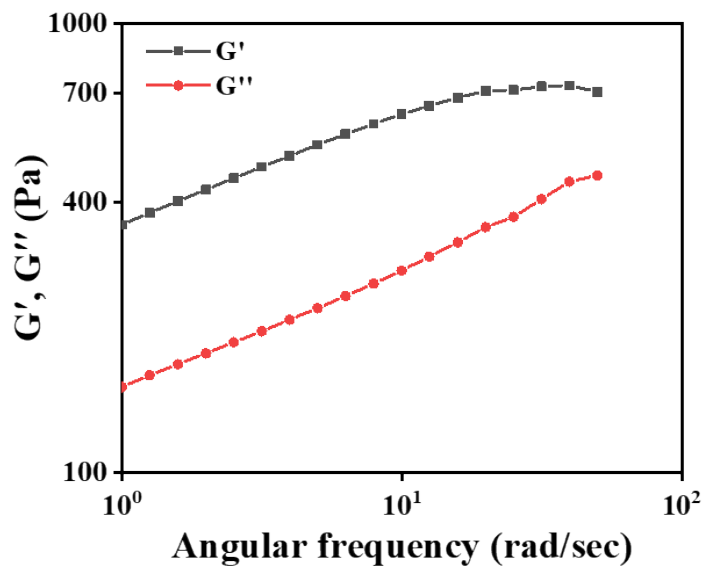

Fig. S1 Frequency spectra of  $G'$  and  $G''$  moduli of the PBP hydrogel.

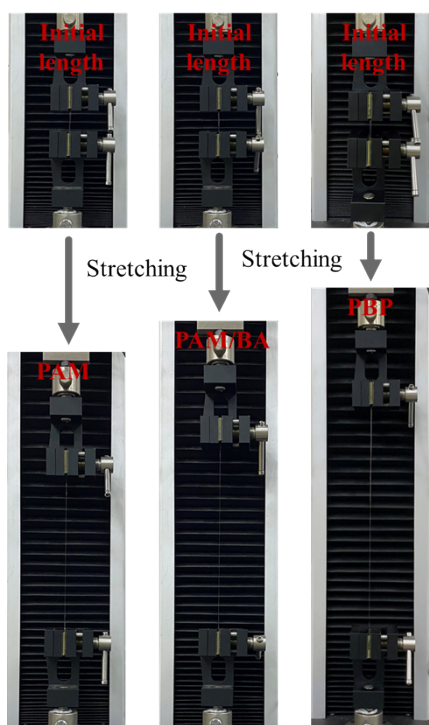

Fig. S2 Tensile tests of PAM, PAM/BA and PBP hydrogels.

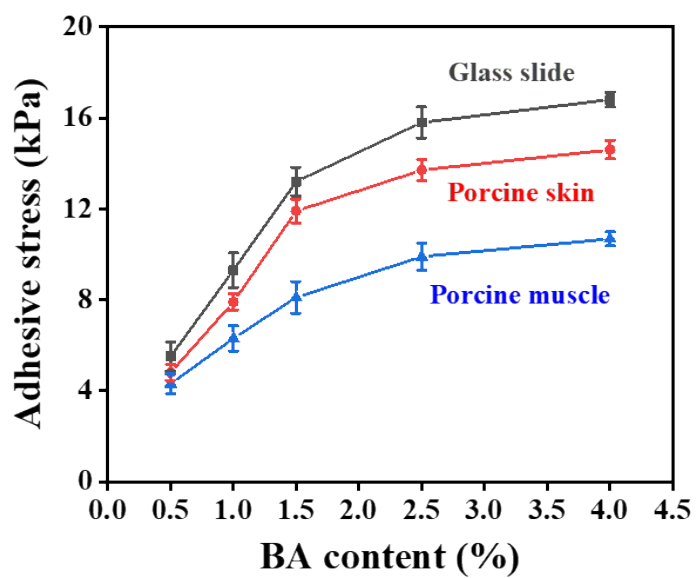

**Fig. S3** Adhesive strength of the PAM/BA hydrogels with different BA contents to porcine skin, muscle, and glass slide.

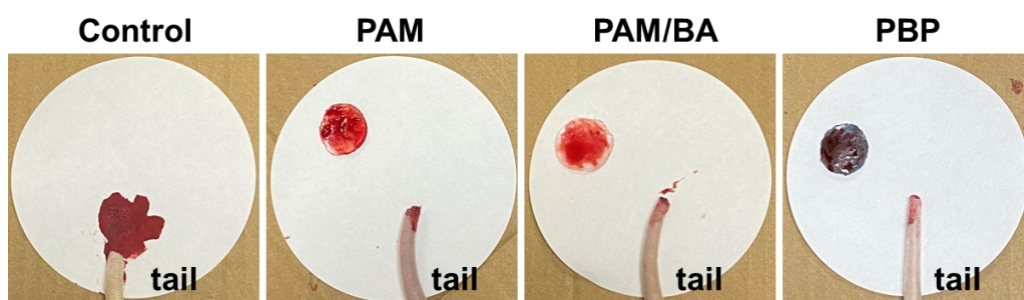

**Fig. S4** Representative pictures of blood loss in a mouse-tail amputation model.

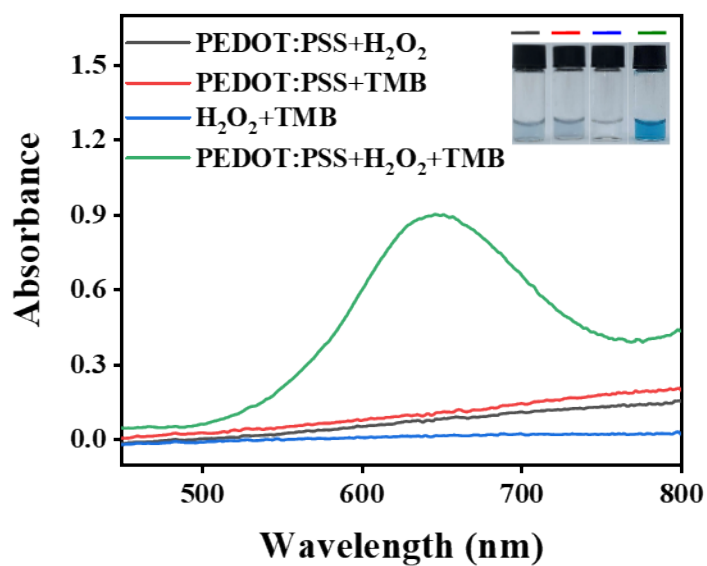

Fig. S5 UV-vis spectra of TMB after various treatments. Inset: The corresponding digital photos.

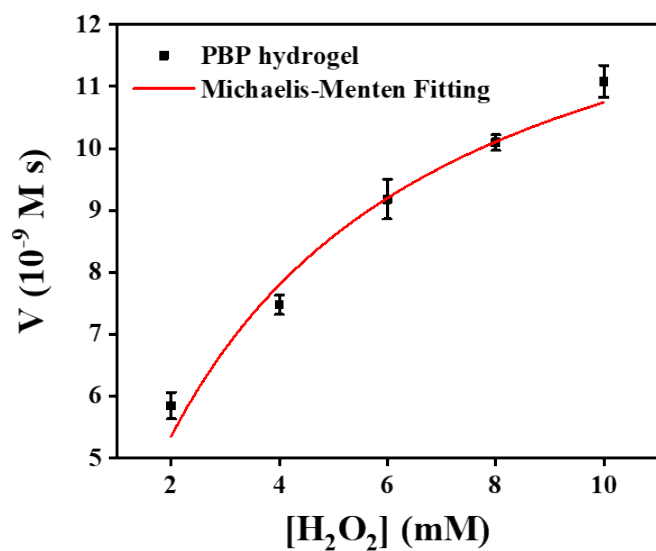

Fig. S6 Michaelis-Menten kinetic curve of the PBP hydrogel.

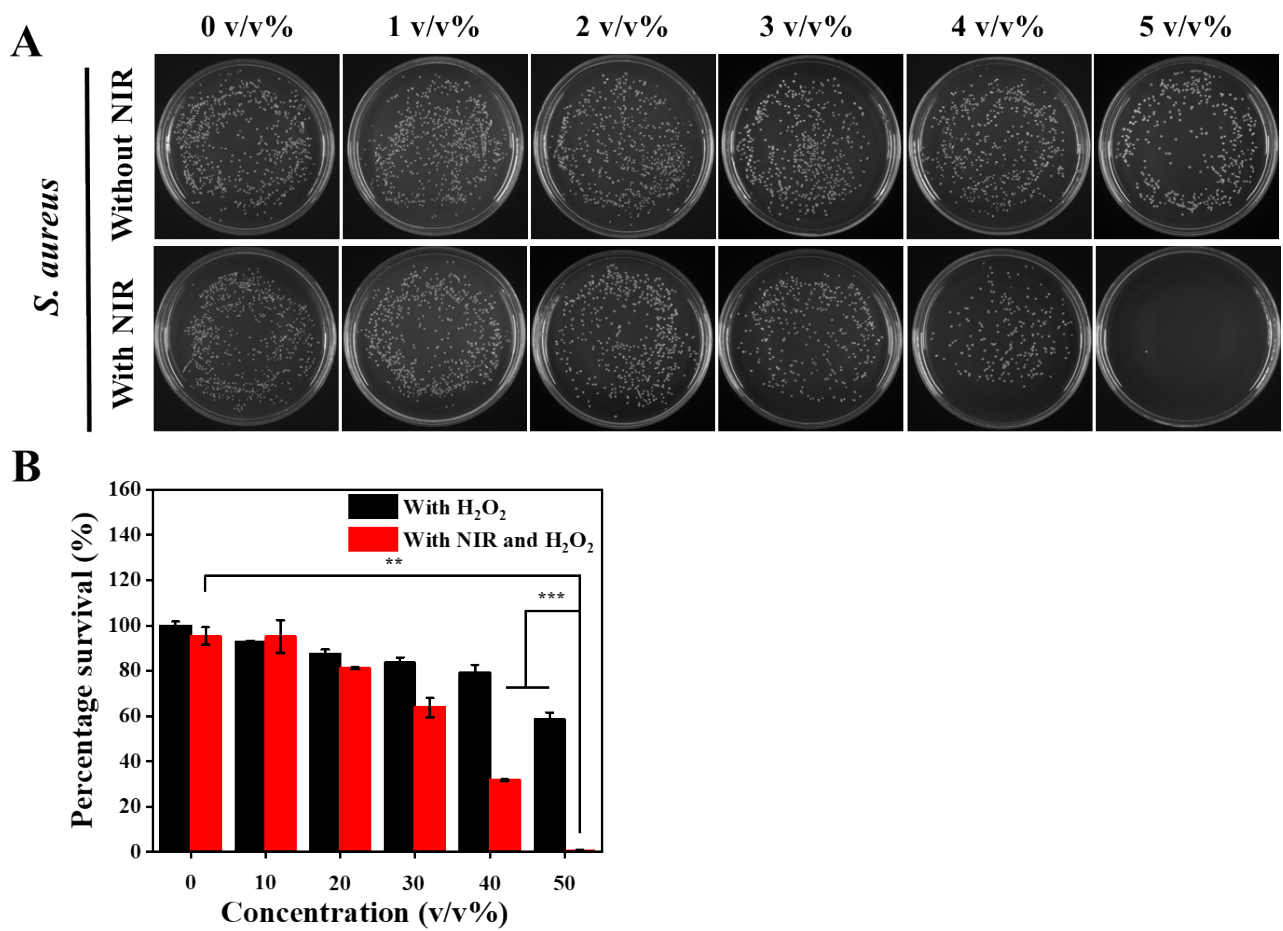

**Fig. S7** (A) Representative digital images of *S. aureus* colonies on the agar plate after being treated with PBP hydrogels containing various PEDOT:PSS concentrations. (B) The corresponding viabilities from the data in (A).

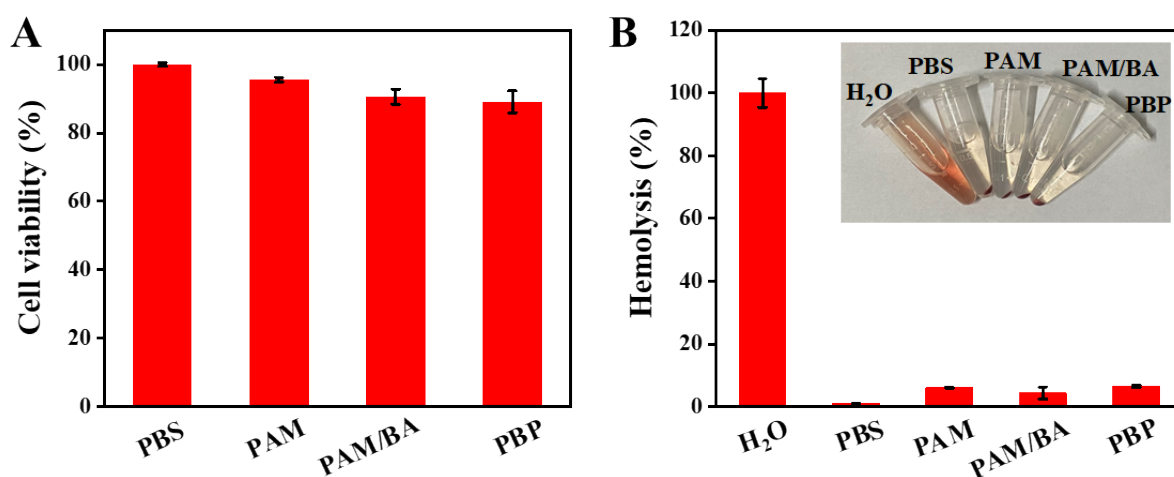

**Fig. S8** Cytotoxicity of the PBP hydrogel. (A) Viabilities of HEK293 cells treated with PBS, PAM, PAM/BA, and PBP hydrogels. (B) Hemolysis ratios of H<sub>2</sub>O, PBS, PAM, PAM/BA, and PBP hydrogels.

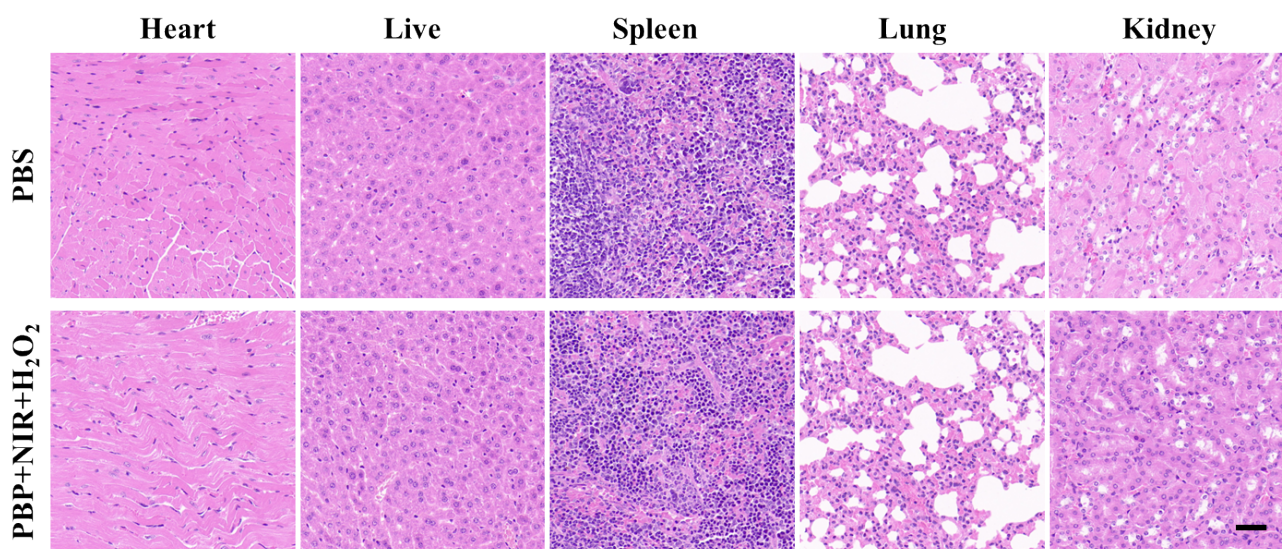

**Fig. S9** H&E staining images of major organs (heart, liver, spleen, lung, and kidney) of mice after various treatments for 6 days. Scale bar: 50  $\mu$ m.

**Table S1.** Synthesis of PAM, PAM/BA and PBP hydrogels.

| Hydrogels | PEDOT:PSS<br>( $\mu\text{L}$ ) | BA<br>(mg) | AM<br>(g) | APS<br>(mg) | MDA<br>(mg) | TEMED<br>( $\mu\text{L}$ ) | Water<br>(mL) |
|-----------|--------------------------------|------------|-----------|-------------|-------------|----------------------------|---------------|
| PAM       | 0                              | 0          | 2         | 15          | 2           | 20                         | 10            |
| PAM/BA    | 0                              | 50         | 2         | 15          | 2           | 20                         | 10            |
| PBP       | 100                            | 50         | 2         | 15          | 2           | 20                         | 10            |
|           | 200                            | 50         | 2         | 15          | 2           | 20                         | 10            |
|           | 300                            | 50         | 2         | 15          | 2           | 20                         | 10            |
|           | 400                            | 50         | 2         | 15          | 2           | 20                         | 10            |
|           | 500                            | 50         | 2         | 15          | 2           | 20                         | 10            |
